# Supplementary material
Source: Springer Nature journal article supplement (https://www.springermedizin.de/resource/supplementary/12885_2006_602_MOESM1_ESM.pdf/9469870)

**A)**

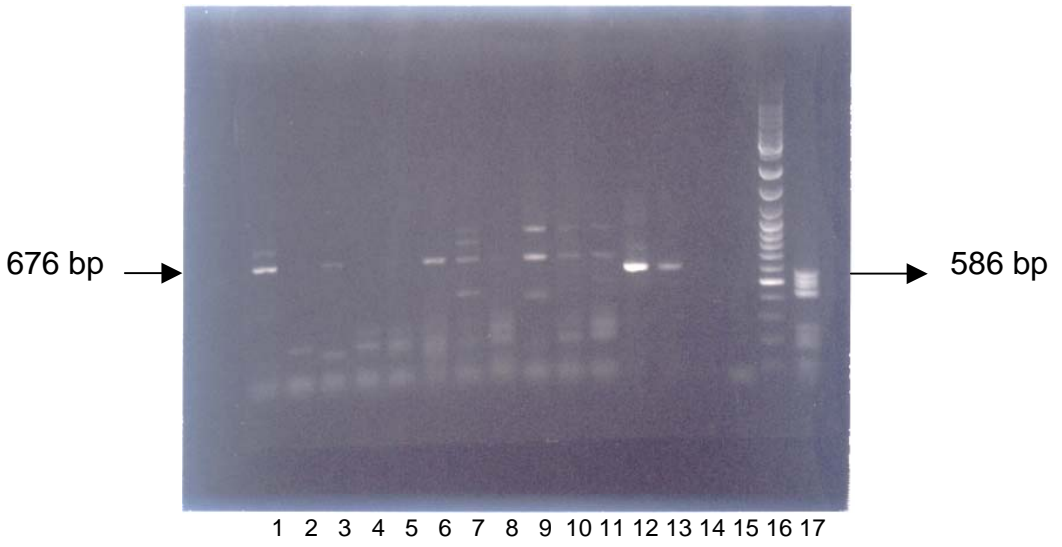

**B)**

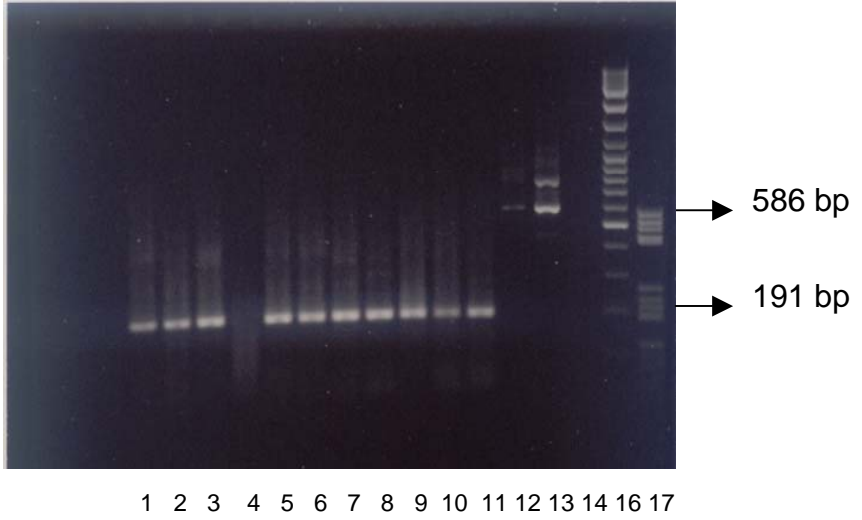

**C)**

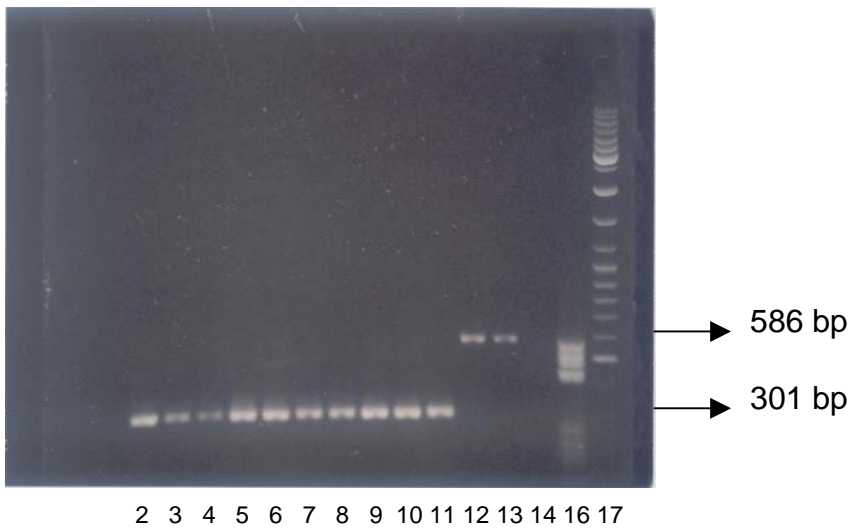

Supplement: MOESM1 [file 9469870]
